# Supplementary material for: Integrating Computational Modeling and Experimental Validation to Unveil Tyrosinase Inhibition Mechanisms of Flavonoids from Alhagi graecorum
Source: PubMed Central journal article supplement — ACS Omega. 2024 Nov 13;9(47):47167–79. doi: 10.1021/acsomega.4c07624 (PMC11603274; doi:10.1021/acsomega.4c07624), 2024-11-13
Supplement: ao4c07624_si_001.pdf [file ao4c07624_si_001.pdf]

## Supplementary Material

### Title:

**Integrating Computational Modeling and Experimental Validation to Unveil Tyrosinase  
Inhibition Mechanisms of Flavonoids from *Alhagi graecorum***

### Authors and affiliations:

**Reem S. Alruhaimi<sup>1</sup>, Ayman M. Mahmoud<sup>2,3</sup>, Sulaiman M. Alnasser<sup>4</sup>, Mohammed F.  
Alotaibi<sup>5</sup>, Ibrahim Elbagory<sup>6</sup>, Ashraf A. El-Bassuony<sup>7</sup>, Al Mokhtar Lamsabhi<sup>8,9</sup>,  
Emadeldin M. Kamel<sup>7\*</sup>**

<sup>1</sup>Department of Biology, College of Science, Princess Nourah bint Abdulrahman University, Riyadh 11671, Saudi Arabia.

<sup>2</sup>Department of Life Sciences, Faculty of Science and Engineering, Manchester Metropolitan University, Manchester M1 5GD, UK.

<sup>3</sup>Molecular Physiology Division, Zoology Department, Faculty of Science, Beni-Suef University, Beni-Suef 62514, Egypt.

<sup>4</sup>Department of Pharmacology and Toxicology, College of Pharmacy, Qassim University, Qassim 51452, Saudi Arabia.

<sup>5</sup>Physiology Department, College of Medicine, King Saud University, Riyadh, 11461, Saudi Arabia

<sup>6</sup>Department of Pharmaceutics, Faculty of Pharmacy, Northern Border University, Rafha 76321, Saudi Arabia.

<sup>7</sup>Organic Chemistry Department, Faculty of Science, Beni-Suef University, Beni-Suef 62514, Egypt.

<sup>8</sup>Departamento de Química, Módulo 13, Universidad Autónoma de Madrid, Campus de Excelencia UAM-CSIC Cantoblanco, Madrid 28049, Spain.

<sup>9</sup>Institute for Advanced Research in Chemical Sciences (IAdChem), Universidad Autónoma de Madrid, Madrid 28049, Spain.

\*Corresponding author:

**Emadeldin M. Kamel**

Organic Chemistry Department, Faculty of Science, Beni-Suef University, Beni-Suef 62514, Egypt.

E-mail: [emad.abdelhameed@science.bsu.edu.eg](mailto:emad.abdelhameed@science.bsu.edu.eg)

## Content

|                                                                                              |    |
|----------------------------------------------------------------------------------------------|----|
| Cartesian coordinates of DFT optimized flavonoids at the B3LYP level of theory.....          | 2  |
| Figure S1. DFT optimized geometries of isolated flavonoids at the B3LYP level of theory..... | 12 |
| Figure S2. <sup>1</sup> H-NMR (DMSO-d <sub>6</sub> ) spectrum of compound <b>1</b> .....     | 12 |
| Figure S3. <sup>13</sup> C-NMR (DMSO-d <sub>6</sub> ) spectrum of compound <b>1</b> .....    | 13 |
| Figure S4. <sup>1</sup> H-NMR (DMSO-d <sub>6</sub> ) spectrum of compound <b>2</b> .....     | 13 |
| Figure S5. <sup>13</sup> C-NMR (DMSO-d <sub>6</sub> ) spectrum of compound <b>2</b> .....    | 14 |
| Figure S6. <sup>1</sup> H-NMR (DMSO-d <sub>6</sub> ) spectrum of compound <b>3</b> .....     | 14 |
| Figure S7. <sup>13</sup> C-NMR (DMSO-d <sub>6</sub> ) spectrum of compound <b>3</b> .....    | 15 |
| Figure S8. <sup>1</sup> H-NMR (DMSO-d <sub>6</sub> ) spectrum of compound <b>4</b> .....     | 15 |
| Figure S9. <sup>13</sup> C-NMR (DMSO-d <sub>6</sub> ) spectrum of compound <b>4</b> .....    | 16 |
| Figure S10. <sup>1</sup> H-NMR (DMSO-d <sub>6</sub> ) spectrum of compound <b>5</b> .....    | 16 |
| Figure S11. <sup>13</sup> C-NMR (DMSO-d <sub>6</sub> ) spectrum of compound <b>5</b> .....   | 17 |

Cartesian coordinates of DFT optimized flavonoids at the B3LYP level of theory.

**Compound 1**

|   |         |          |          |
|---|---------|----------|----------|
| C | 0.56751 | 3.56298  | 0.34468  |
| C | 0.97179 | 2.22614  | 0.35112  |
| C | 2.33967 | 1.97828  | 0.2584   |
| C | 3.29344 | 3.00988  | 0.14971  |
| C | 2.85188 | 4.36216  | 0.13428  |
| C | 1.49105 | 4.62691  | 0.24402  |
| C | 4.70226 | 2.7053   | 0.06055  |
| C | 5.04373 | 1.28828  | 0.08049  |
| C | 4.07112 | 0.32919  | 0.19403  |
| C | 4.28559 | -1.12941 | 0.22449  |
| C | 5.46375 | -1.67851 | 0.75161  |
| C | 3.28977 | -1.99468 | -0.27663 |
| C | 5.6604  | -3.06057 | 0.76981  |
| H | 6.23096 | -1.02701 | 1.14675  |
| C | 3.49241 | -3.36726 | -0.27243 |
| H | 2.36139 | -1.60414 | -0.67711 |
| C | 4.68357 | -3.90654 | 0.25557  |
| H | 6.57718 | -3.4622  | 1.18697  |
| O | 2.75063 | 0.66907  | 0.28366  |
| O | 5.57839 | 3.60042  | -0.03436 |
| O | 2.54847 | -4.21287 | -0.78434 |
| H | 2.90987 | -5.11295 | -0.69762 |
| O | 4.74556 | -5.27594 | 0.19377  |
| O | 6.36189 | 0.92023  | 0.04341  |
| O | 3.73296 | 5.37256  | 0.02339  |
| H | 0.23201 | 1.43597  | 0.43302  |

|   |          |          |          |
|---|----------|----------|----------|
| O | -0.74612 | 3.86874  | 0.43064  |
| H | -0.79241 | 4.84277  | 0.36158  |
| H | 4.63444  | 4.93961  | -0.0231  |
| H | 1.14293  | 5.63866  | 0.25222  |
| H | 5.66419  | -5.55444 | 0.1812   |
| C | 7.1851   | 2.08362  | 0.16064  |
| C | 7.36946  | 3.06611  | 1.11142  |
| O | 8.01902  | 2.31389  | -0.9344  |
| C | 8.37523  | 3.96661  | 0.58765  |
| C | 8.73899  | 3.47447  | -0.64889 |
| H | 9.78539  | 3.25101  | -0.64751 |
| C | 8.44532  | 4.53486  | -1.72636 |
| H | 7.9362   | 5.36408  | -1.28129 |
| H | 7.83001  | 4.10664  | -2.48986 |
| O | 9.67535  | 4.98357  | -2.30131 |
| H | 9.51178  | 5.75901  | -2.8431  |
| H | 7.96834  | 4.95091  | 0.48521  |
| H | 7.70937  | 2.63019  | 2.02757  |
| H | 6.37802  | 2.65647  | -0.246   |
| O | 9.5099   | 3.99302  | 1.45754  |
| H | 9.74352  | 4.90364  | 1.65195  |
| O | 6.14539  | 3.77258  | 1.32922  |
| H | 6.20593  | 4.27453  | 2.1453   |

**Compound 2**

|   |         |         |         |
|---|---------|---------|---------|
| C | 0.56751 | 3.56298 | 0.34468 |
| C | 0.97179 | 2.22614 | 0.35112 |
| C | 2.33967 | 1.97828 | 0.2584  |
| C | 3.29344 | 3.00988 | 0.14971 |

|   |          |          |          |
|---|----------|----------|----------|
| C | 2.85188  | 4.36216  | 0.13428  |
| C | 1.49105  | 4.62691  | 0.24402  |
| C | 4.70226  | 2.7053   | 0.06055  |
| C | 5.04373  | 1.28828  | 0.08049  |
| C | 4.07112  | 0.32919  | 0.19403  |
| C | 4.28559  | -1.12941 | 0.22449  |
| C | 5.46375  | -1.67851 | 0.75161  |
| C | 3.28977  | -1.99468 | -0.27663 |
| C | 5.6604   | -3.06057 | 0.76981  |
| H | 6.23096  | -1.02701 | 1.14675  |
| C | 3.49241  | -3.36726 | -0.27243 |
| H | 2.36139  | -1.60414 | -0.67711 |
| C | 4.68357  | -3.90654 | 0.25557  |
| H | 6.57718  | -3.4622  | 1.18697  |
| O | 2.75063  | 0.66907  | 0.28366  |
| O | 5.57839  | 3.60042  | -0.03436 |
| O | 2.54847  | -4.21287 | -0.78434 |
| H | 2.90987  | -5.11295 | -0.69762 |
| O | 4.74556  | -5.27594 | 0.19377  |
| O | 6.36189  | 0.92023  | 0.04341  |
| O | 3.73296  | 5.37256  | 0.02339  |
| H | 0.23201  | 1.43597  | 0.43302  |
| O | -0.74612 | 3.86874  | 0.43064  |
| H | -0.79241 | 4.84277  | 0.36158  |
| H | 4.63444  | 4.93961  | -0.0231  |
| H | 1.14293  | 5.63866  | 0.25222  |
| H | 5.66419  | -5.55444 | 0.1812   |
| C | 7.1851   | 2.08362  | 0.16064  |

|   |          |         |          |
|---|----------|---------|----------|
| C | 8.05663  | 2.21558 | -1.07207 |
| H | 6.50472  | 2.97244 | 0.23314  |
| C | 8.97356  | 3.16213 | 1.53978  |
| C | 9.00531  | 3.39073 | -0.95113 |
| H | 7.40925  | 2.3472  | -1.97762 |
| C | 9.84401  | 3.2961  | 0.30708  |
| H | 8.38319  | 4.10509 | 1.68349  |
| H | 8.41584  | 4.34505 | -0.93493 |
| H | 10.52659 | 2.40888 | 0.23447  |
| O | 8.02432  | 1.98749 | 1.41851  |
| O | 10.66464 | 4.46128 | 0.42455  |
| H | 11.55674 | 4.25537 | 0.13584  |
| O | 9.86182  | 3.43428 | -2.09542 |
| H | 9.93631  | 4.3397  | -2.40567 |
| O | 8.80947  | 1.0133  | -1.25276 |
| H | 9.10457  | 0.95393 | -2.16435 |
| C | 9.86408  | 2.97973 | 2.78289  |
| H | 10.62119 | 2.25258 | 2.57568  |
| H | 9.26531  | 2.64691 | 3.60484  |
| O | 10.47937 | 4.22697 | 3.11563  |
| H | 10.97901 | 4.13073 | 3.92969  |

**Compound 3**

|   |         |         |         |
|---|---------|---------|---------|
| C | 0.56751 | 3.56298 | 0.34468 |
| C | 0.97179 | 2.22614 | 0.35112 |
| C | 2.33967 | 1.97828 | 0.2584  |
| C | 3.29344 | 3.00988 | 0.14971 |
| C | 2.85188 | 4.36216 | 0.13428 |
| C | 1.49105 | 4.62691 | 0.24402 |

|   |          |          |          |
|---|----------|----------|----------|
| C | 4.70226  | 2.7053   | 0.06055  |
| C | 5.04373  | 1.28828  | 0.08049  |
| C | 4.07112  | 0.32919  | 0.19403  |
| C | 4.28559  | -1.12941 | 0.22449  |
| C | 5.46375  | -1.67851 | 0.75161  |
| C | 3.28977  | -1.99468 | -0.27663 |
| C | 5.6604   | -3.06057 | 0.76981  |
| H | 6.23096  | -1.02701 | 1.14675  |
| C | 3.49241  | -3.36726 | -0.27243 |
| H | 2.36139  | -1.60414 | -0.67711 |
| C | 4.68357  | -3.90654 | 0.25557  |
| H | 6.57718  | -3.4622  | 1.18697  |
| O | 2.75063  | 0.66907  | 0.28366  |
| O | 5.57839  | 3.60042  | -0.03436 |
| O | 2.54847  | -4.21287 | -0.78434 |
| O | 4.74556  | -5.27594 | 0.19377  |
| O | 6.36189  | 0.92023  | 0.04341  |
| O | 3.73296  | 5.37256  | 0.02339  |
| H | 0.23201  | 1.43597  | 0.43302  |
| O | -0.74612 | 3.86874  | 0.43064  |
| H | -0.79241 | 4.84277  | 0.36158  |
| H | 4.63444  | 4.93961  | -0.0231  |
| H | 1.14293  | 5.63866  | 0.25222  |
| H | 5.66419  | -5.55444 | 0.1812   |
| C | 7.1851   | 2.08362  | 0.16064  |
| C | 7.36946  | 3.06611  | 1.11142  |
| O | 8.01902  | 2.31389  | -0.9344  |
| C | 8.37523  | 3.96661  | 0.58765  |

|   |         |          |          |
|---|---------|----------|----------|
| C | 8.73899 | 3.47447  | -0.64889 |
| H | 9.78539 | 3.25101  | -0.64751 |
| C | 8.44532 | 4.53486  | -1.72636 |
| H | 7.9362  | 5.36408  | -1.28129 |
| H | 7.83001 | 4.10664  | -2.48986 |
| O | 9.67535 | 4.98357  | -2.30131 |
| H | 9.51178 | 5.75901  | -2.8431  |
| H | 7.96834 | 4.95091  | 0.48521  |
| H | 7.70937 | 2.63019  | 2.02757  |
| H | 6.37802 | 2.65647  | -0.246   |
| O | 9.5099  | 3.99302  | 1.45754  |
| H | 9.74352 | 4.90364  | 1.65195  |
| O | 6.14539 | 3.77258  | 1.32922  |
| H | 6.20593 | 4.27453  | 2.1453   |
| C | 3.07918 | -5.53462 | -0.65699 |
| H | 4.00461 | -5.60028 | -1.19006 |
| H | 3.24679 | -5.75358 | 0.37687  |
| H | 2.38325 | -6.239   | -1.06248 |

**Compound 4**

|   |         |         |         |
|---|---------|---------|---------|
| C | 0.56751 | 3.56298 | 0.34468 |
| C | 0.97179 | 2.22614 | 0.35112 |
| C | 2.33967 | 1.97828 | 0.2584  |
| C | 3.29344 | 3.00988 | 0.14971 |
| C | 2.85188 | 4.36216 | 0.13428 |
| C | 1.49105 | 4.62691 | 0.24402 |
| C | 4.70226 | 2.7053  | 0.06055 |
| C | 5.04373 | 1.28828 | 0.08049 |
| C | 4.07112 | 0.32919 | 0.19403 |



|   |          |          |          |
|---|----------|----------|----------|
| C | 4.28559  | -1.12941 | 0.22449  |
| C | 5.46375  | -1.67851 | 0.75161  |
| C | 3.28977  | -1.99468 | -0.27663 |
| C | 5.6604   | -3.06057 | 0.76981  |
| H | 6.23096  | -1.02701 | 1.14675  |
| C | 3.49241  | -3.36726 | -0.27243 |
| H | 2.36139  | -1.60414 | -0.67711 |
| C | 4.68357  | -3.90654 | 0.25557  |
| H | 6.57718  | -3.4622  | 1.18697  |
| O | 2.75063  | 0.66907  | 0.28366  |
| O | 5.57839  | 3.60042  | -0.03436 |
| O | 2.54847  | -4.21287 | -0.78434 |
| H | 2.90987  | -5.11295 | -0.69762 |
| O | 4.74556  | -5.27594 | 0.19377  |
| O | 6.36189  | 0.92023  | 0.04341  |
| O | 3.73296  | 5.37256  | 0.02339  |
| H | 0.23201  | 1.43597  | 0.43302  |
| O | -0.74612 | 3.86874  | 0.43064  |
| H | -0.79241 | 4.84277  | 0.36158  |
| H | 4.63444  | 4.93961  | -0.0231  |
| H | 1.14293  | 5.63866  | 0.25222  |
| C | 7.1851   | 2.08362  | 0.16064  |
| C | 8.05663  | 2.21558  | -1.07207 |
| H | 6.50472  | 2.97244  | 0.23314  |
| C | 8.97356  | 3.16213  | 1.53978  |
| C | 9.00531  | 3.39073  | -0.95113 |
| H | 7.40925  | 2.3472   | -1.97762 |
| C | 9.84401  | 3.2961   | 0.30708  |

|   |          |          |          |
|---|----------|----------|----------|
| H | 8.38319  | 4.10509  | 1.68349  |
| H | 8.41584  | 4.34505  | -0.93493 |
| H | 10.52659 | 2.40888  | 0.23447  |
| O | 8.02432  | 1.98749  | 1.41851  |
| O | 10.66464 | 4.46128  | 0.42455  |
| H | 11.55674 | 4.25537  | 0.13584  |
| O | 9.86182  | 3.43428  | -2.09542 |
| H | 9.93631  | 4.3397   | -2.40567 |
| O | 8.80947  | 1.0133   | -1.25276 |
| H | 9.10457  | 0.95393  | -2.16435 |
| C | 9.86408  | 2.97973  | 2.78289  |
| H | 10.62119 | 2.25258  | 2.57568  |
| H | 9.26531  | 2.64691  | 3.60484  |
| H | 10.32447 | 3.91298  | 3.03186  |
| C | 6.11393  | -5.69079 | 0.17505  |
| H | 6.56719  | -5.46773 | 1.11829  |
| H | 6.1648   | -6.74433 | -0.00484 |
| H | 6.6337   | -5.17073 | -0.60231 |

**Compound 5**

|   |         |         |         |
|---|---------|---------|---------|
| C | 0.56751 | 3.56298 | 0.34468 |
| C | 0.97179 | 2.22614 | 0.35112 |
| C | 2.33967 | 1.97828 | 0.2584  |
| C | 3.29344 | 3.00988 | 0.14971 |
| C | 2.85188 | 4.36216 | 0.13428 |
| C | 1.49105 | 4.62691 | 0.24402 |
| C | 4.70226 | 2.7053  | 0.06055 |
| C | 5.04373 | 1.28828 | 0.08049 |
| C | 4.07112 | 0.32919 | 0.19403 |

|   |          |          |          |
|---|----------|----------|----------|
| C | 4.28559  | -1.12941 | 0.22449  |
| C | 5.46375  | -1.67851 | 0.75161  |
| C | 3.28977  | -1.99468 | -0.27663 |
| C | 5.6604   | -3.06057 | 0.76981  |
| H | 6.23096  | -1.02701 | 1.14675  |
| C | 3.49241  | -3.36726 | -0.27243 |
| H | 2.36139  | -1.60414 | -0.67711 |
| C | 4.68357  | -3.90654 | 0.25557  |
| H | 6.57718  | -3.4622  | 1.18697  |
| O | 2.75063  | 0.66907  | 0.28366  |
| O | 5.57839  | 3.60042  | -0.03436 |
| O | 2.54847  | -4.21287 | -0.78434 |
| O | 4.74556  | -5.27594 | 0.19377  |
| O | 3.73296  | 5.37256  | 0.02339  |
| H | 0.23201  | 1.43597  | 0.43302  |
| O | -0.74612 | 3.86874  | 0.43064  |
| H | 4.63444  | 4.93961  | -0.0231  |
| H | 1.14293  | 5.63866  | 0.25222  |
| H | 5.66419  | -5.55444 | 0.1812   |
| C | 3.07918  | -5.53462 | -0.65699 |
| H | 4.00461  | -5.60028 | -1.19006 |
| H | 3.24679  | -5.75358 | 0.37687  |
| H | 2.38325  | -6.239   | -1.06248 |
| H | 6.06924  | 0.99235  | 0.00536  |
| C | -0.81383 | 5.29356  | 0.32962  |
| C | -1.63667 | 5.67833  | -0.88308 |
| H | 0.23429  | 5.67313  | 0.20499  |
| C | -1.8043  | 7.18088  | -0.98216 |

|   |          |         |          |
|---|----------|---------|----------|
| H | -2.6465  | 5.19438 | -0.81679 |
| C | -1.57571 | 7.36791 | 1.50191  |
| C | -2.39731 | 7.75368 | 0.28882  |
| H | -0.80619 | 7.65534 | -1.17461 |
| H | -0.56548 | 7.85128 | 1.4366   |
| H | -3.44641 | 7.37664 | 0.41363  |
| O | -1.40884 | 5.86525 | 1.60071  |
| C | -2.25946 | 7.89564 | 2.7769   |
| H | -1.64984 | 7.67177 | 3.62729  |
| H | -3.21468 | 7.42684 | 2.88948  |
| O | -2.43247 | 9.31139 | 2.67387  |
| H | -2.86888 | 9.63922 | 3.46361  |
| O | -2.46191 | 9.17862 | 0.1874   |
| H | -3.25816 | 9.43041 | -0.28608 |
| O | -2.65095 | 7.4965  | -2.09052 |
| H | -2.19716 | 8.10619 | -2.677   |
| O | -1.0023  | 5.18827 | -2.06728 |
| H | -1.65742 | 5.0808  | -2.76072 |

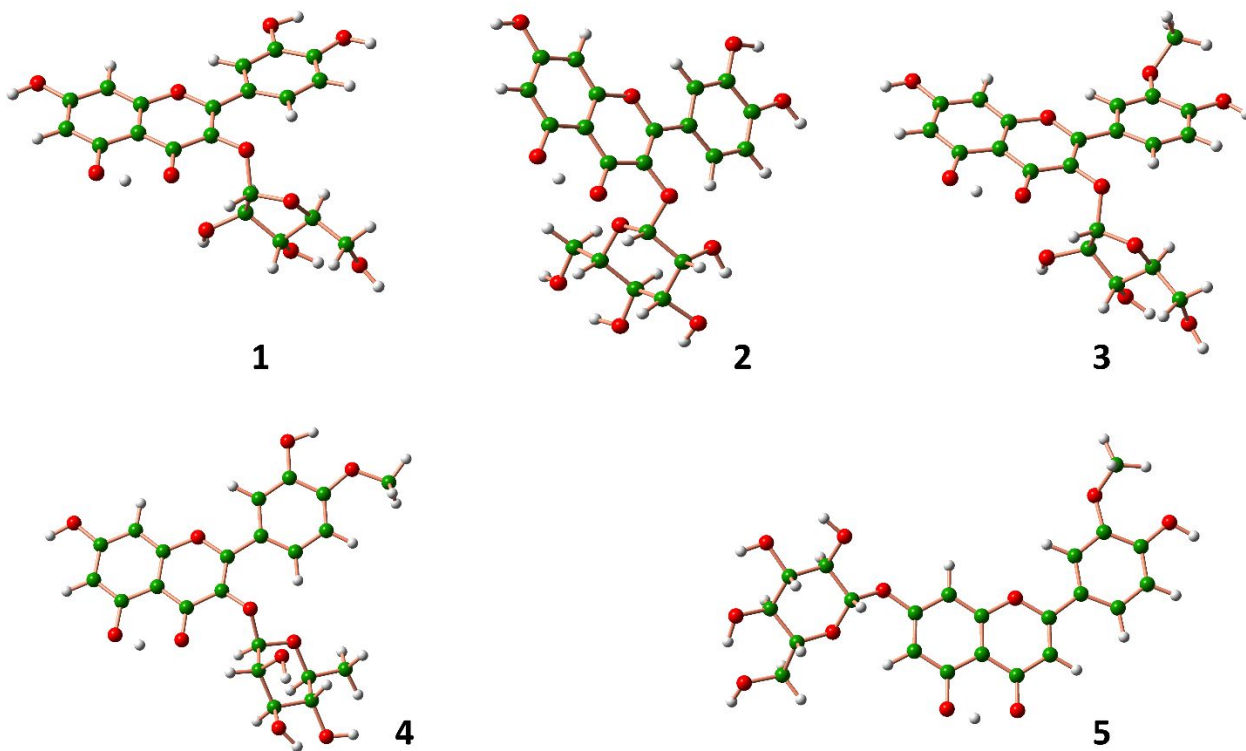

Figure S1. DFT optimized geometries of isolated flavonoids at the B3LYP level of theory.

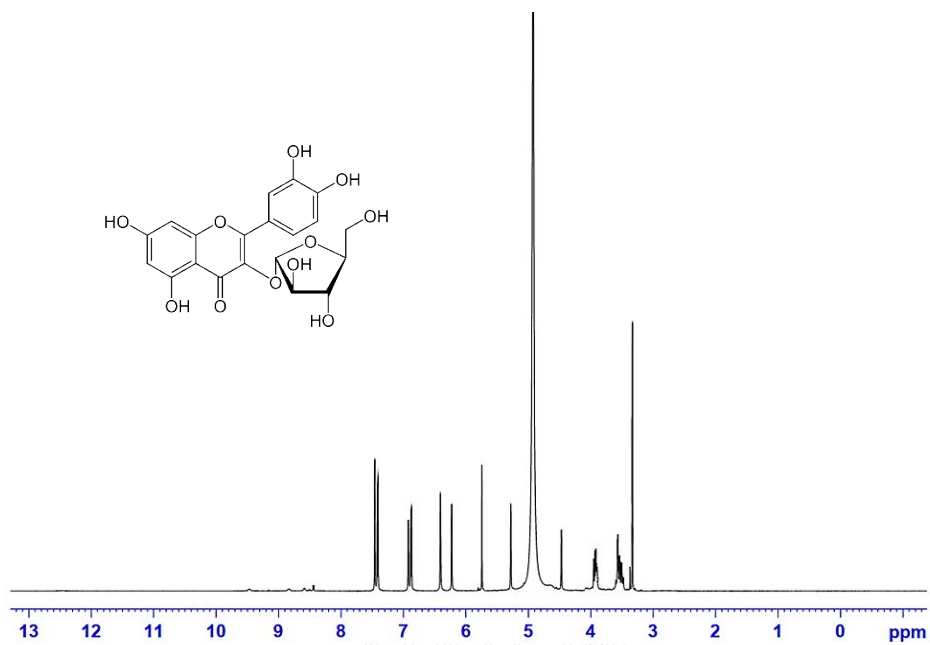

Figure S2.  $^1\text{H-NMR}$  ( $\text{CD}_3\text{OD-d}_6$ ) spectrum of compound **1**.

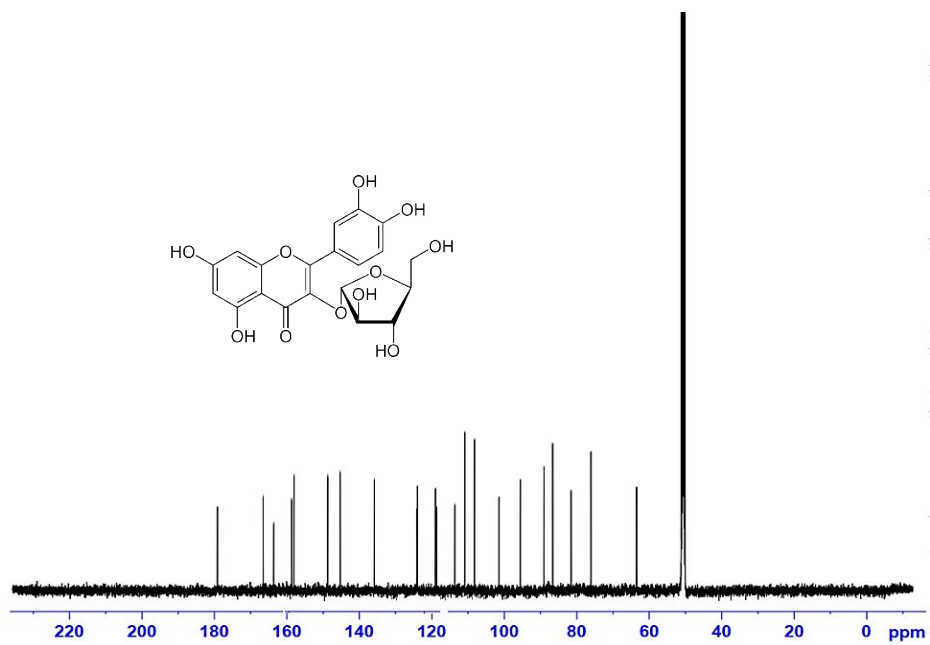

Figure S3. <sup>13</sup>C-NMR (CD<sub>3</sub>OD-d<sub>6</sub>) spectrum of compound 1.

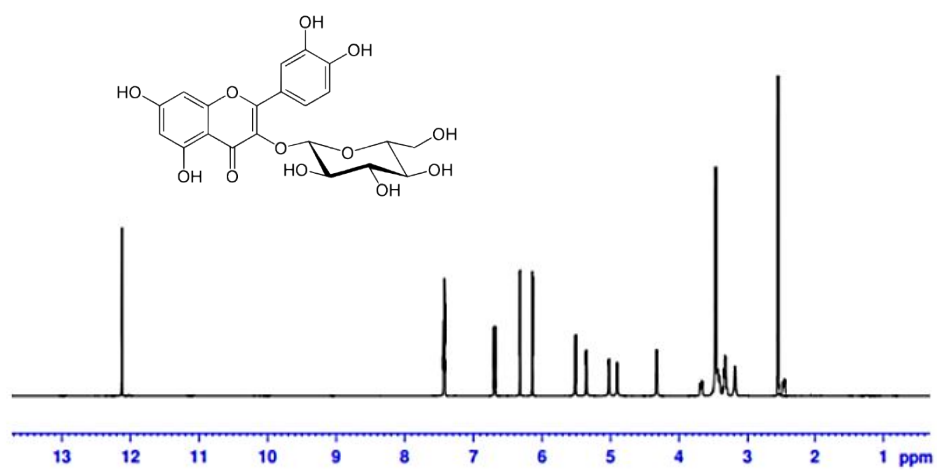

Figure S4. <sup>1</sup>H-NMR (DMSO-d<sub>6</sub>) spectrum of compound 2.

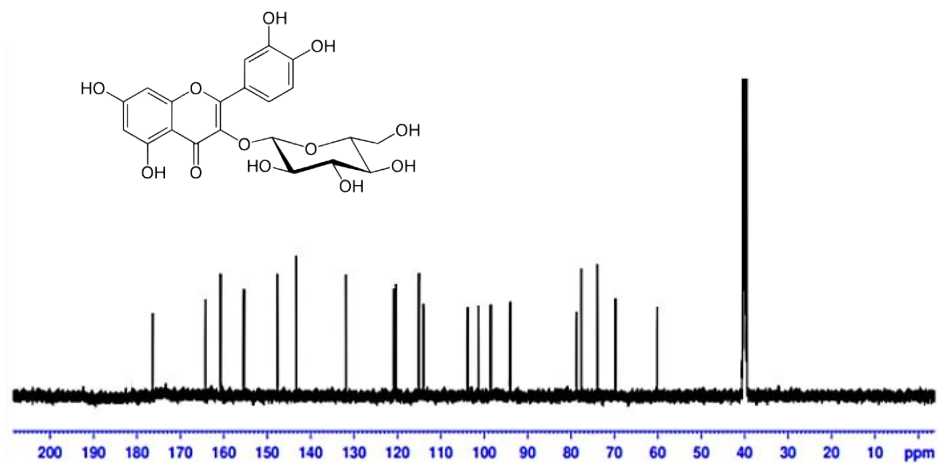

Figure S5.  $^{13}\text{C}$ -NMR (DMSO- $d_6$ ) spectrum of compound **2**.

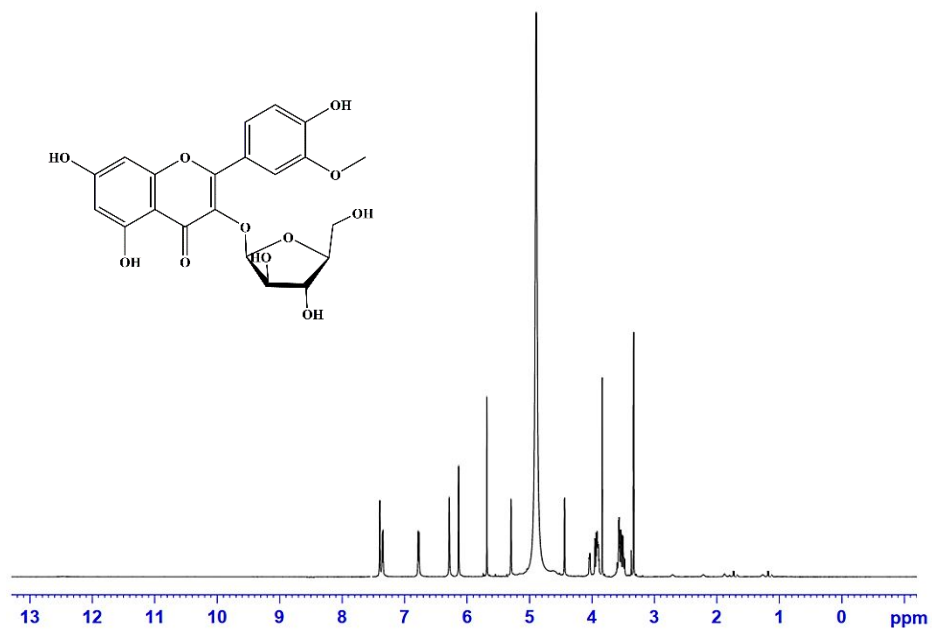

Figure S6.  $^1\text{H}$ -NMR ( $\text{CD}_3\text{OD}-d_6$ ) spectrum of compound **3**.

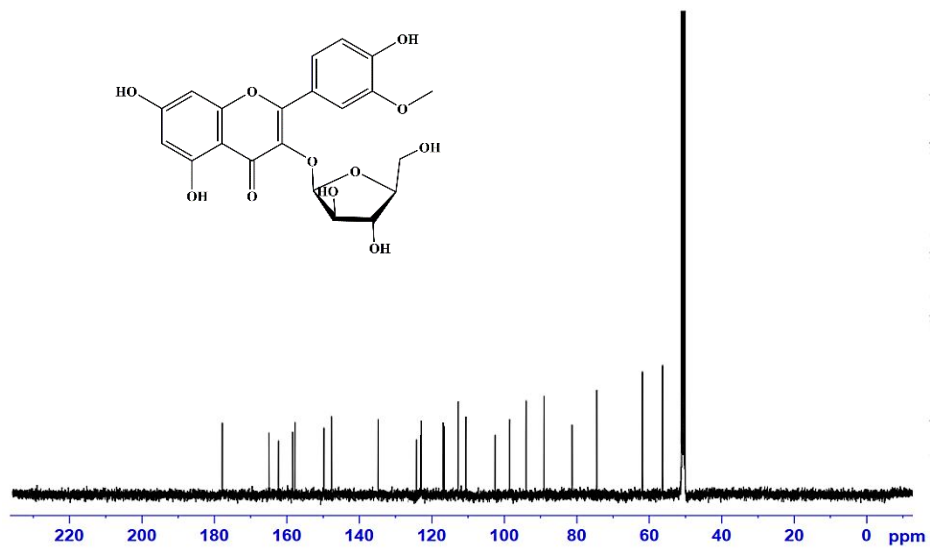

Figure S7. <sup>13</sup>C-NMR (CD<sub>3</sub>OD-d<sub>6</sub>) spectrum of compound 3.

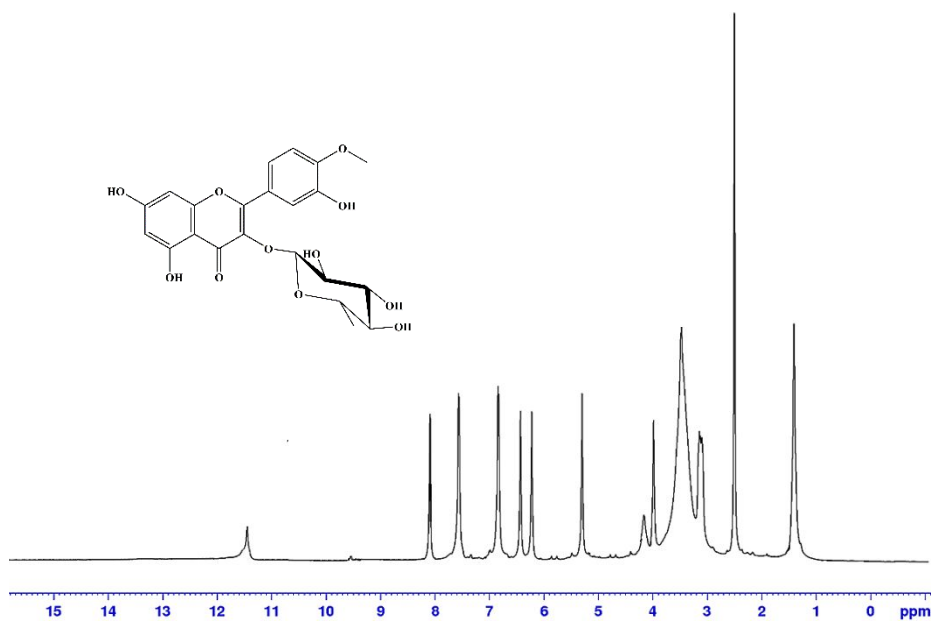

Figure S8. <sup>1</sup>H-NMR (DMSO-d<sub>6</sub>) spectrum of compound 4.



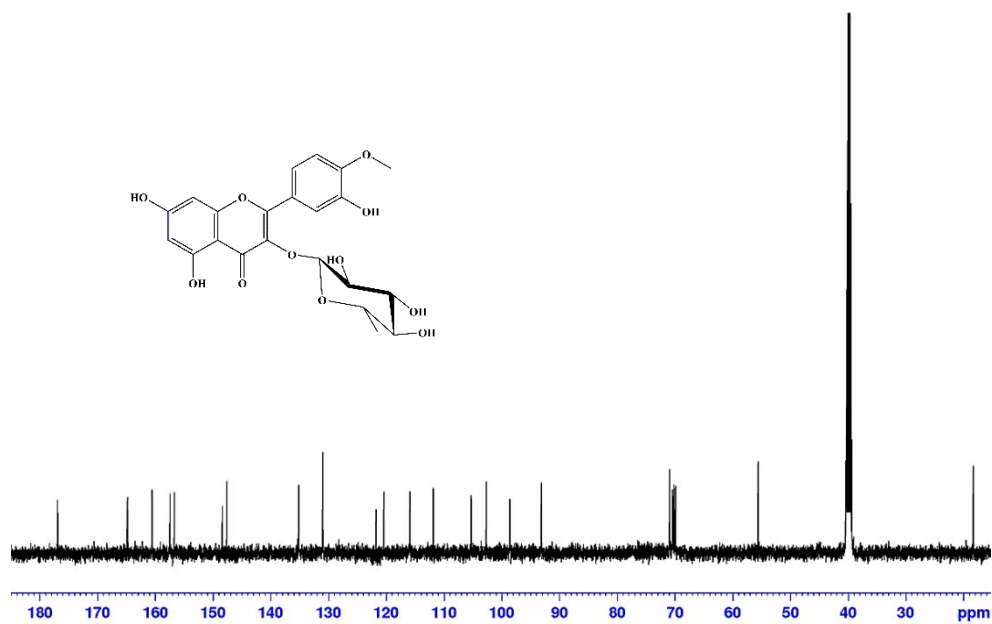

Figure S9. <sup>13</sup>C-NMR (DMSO-d<sub>6</sub>) spectrum of compound 4.

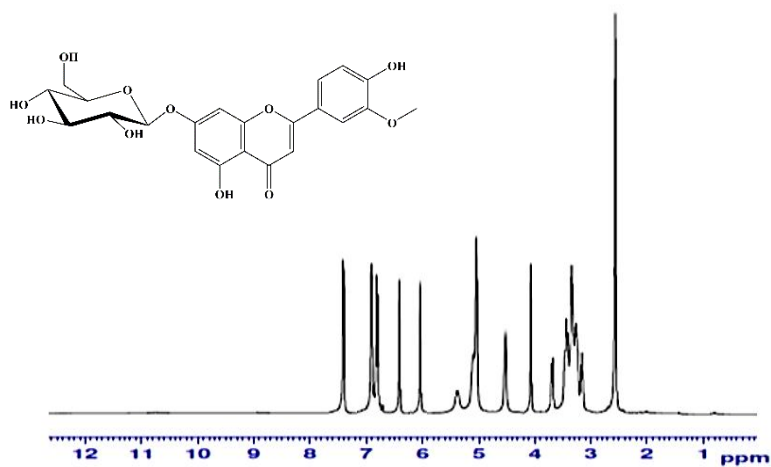

Figure S10. <sup>1</sup>H-NMR (DMSO-d<sub>6</sub>) spectrum of compound 5.

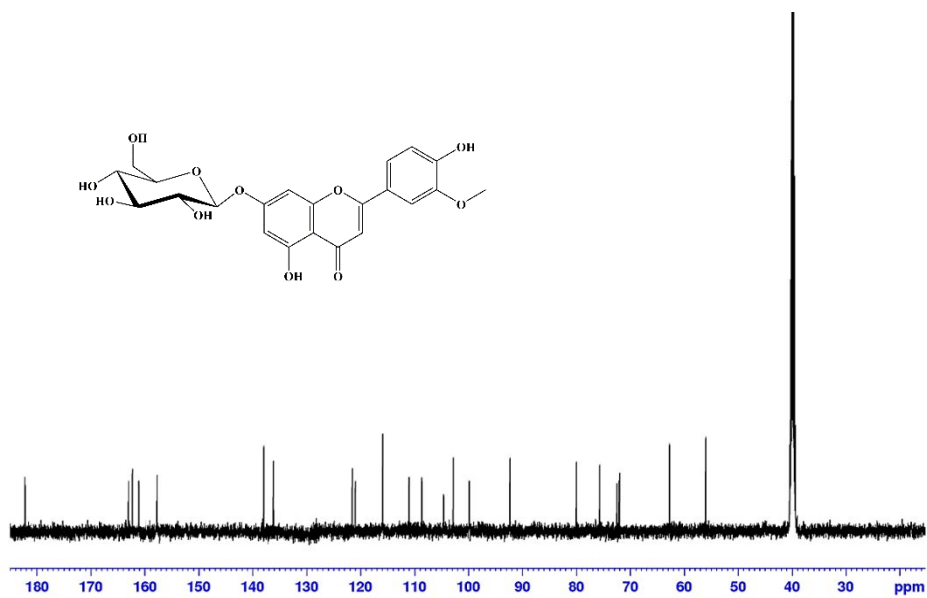

Figure S11.  $^{13}\text{C}$ -NMR ( $\text{DMSO-d}_6$ ) spectrum of compound 5.
